# Supplementary material for: Single-atom transition metals supported on B-doped g-C3N4 monolayers for electrochemical nitrogen reduction
Source: Royal Society of Chemistry journal article supplement (doi:10.1039/d4cp03247k), 2024-12-18
Supplement: d4cp03247k1.pdf [file d4cp03247k1.pdf]

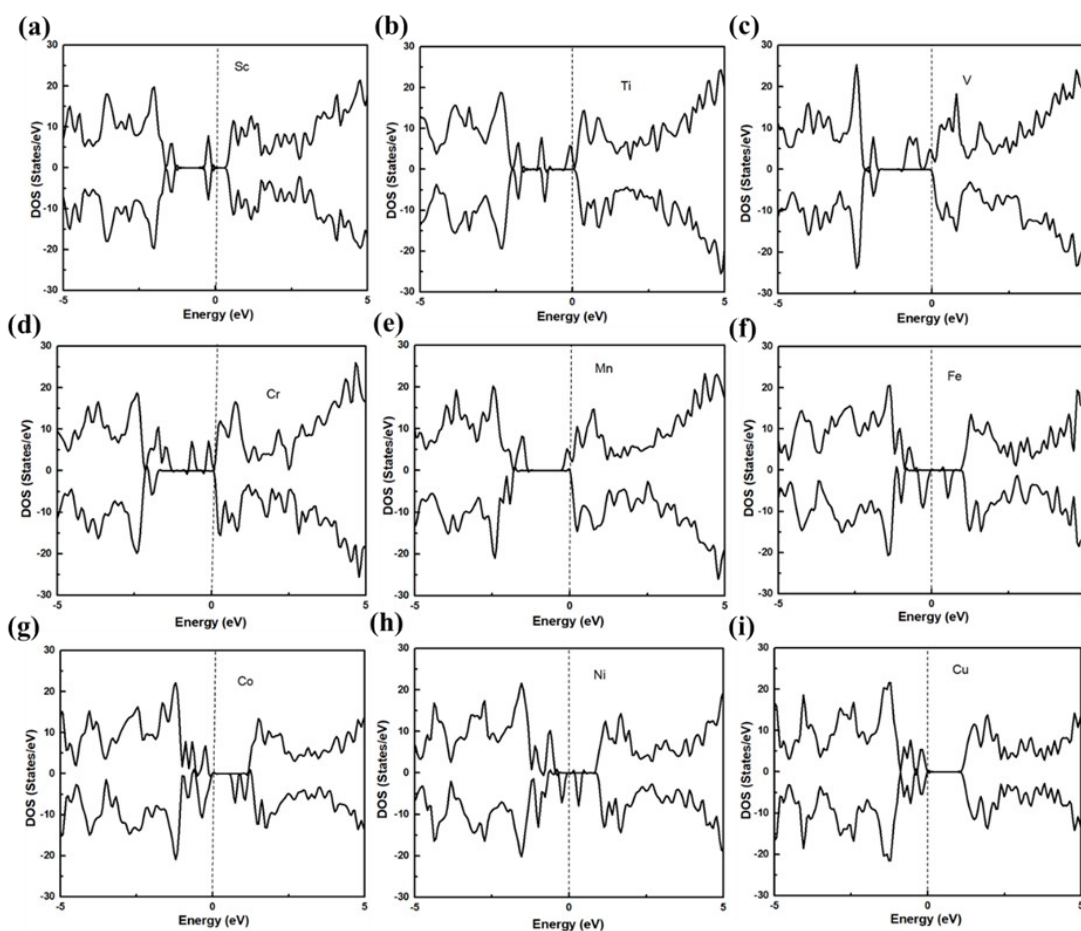

Fig.S1 Density of states (DOS) of the TM@g-BC<sub>3</sub>N<sub>4</sub> system and the Fermi level  $E_f$  is set to 0 eV.

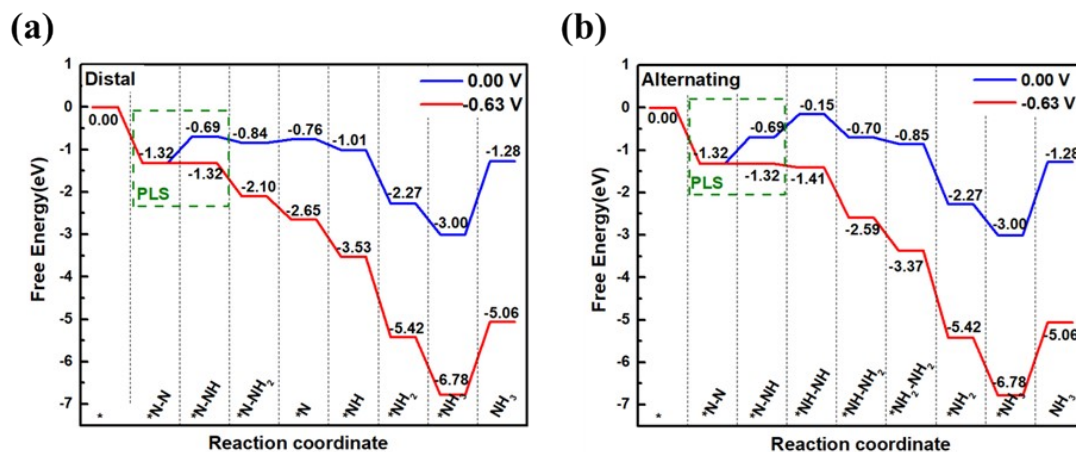

Fig. S2 The NRR reaction free energy diagram of Fe@g-C<sub>3</sub>N<sub>4</sub> through (a) distal mechanism and (b) alternating mechanism.

POSCAR-g-BC3N4

1. 0

|                |                |                |
|----------------|----------------|----------------|
| 14. 3542003632 | 0. 0000000000  | 0. 0000000000  |
| 7. 1774726155  | 12. 4301933552 | 0. 0000000000  |
| 0. 0000000000  | 0. 0000000000  | 20. 0000000000 |

|    |   |    |
|----|---|----|
| C  | B | N  |
| 26 | 1 | 36 |

Direct

|              |              |              |
|--------------|--------------|--------------|
| 0. 058830000 | 0. 067340001 | 0. 466600001 |
| 0. 058830000 | 0. 224199995 | 0. 466600001 |
| 0. 215690002 | 0. 067350000 | 0. 466600001 |
| 0. 392159998 | 0. 067340001 | 0. 466600001 |
| 0. 392159998 | 0. 224199995 | 0. 466600001 |
| 0. 549019992 | 0. 067350000 | 0. 466600001 |
| 0. 725489974 | 0. 067340001 | 0. 466600001 |
| 0. 725489974 | 0. 224199995 | 0. 466600001 |
| 0. 882350028 | 0. 067340001 | 0. 466600001 |
| 0. 058830000 | 0. 400669992 | 0. 466600001 |
| 0. 058830000 | 0. 557529986 | 0. 466600001 |
| 0. 215690002 | 0. 400680006 | 0. 466600001 |
| 0. 392159998 | 0. 400669992 | 0. 466600001 |
| 0. 392159998 | 0. 557529986 | 0. 466600001 |
| 0. 725489974 | 0. 400669992 | 0. 466600001 |
| 0. 725489974 | 0. 557529986 | 0. 466600001 |
| 0. 882350028 | 0. 400680006 | 0. 466600001 |
| 0. 058830000 | 0. 734000027 | 0. 466600001 |
| 0. 058830000 | 0. 890860021 | 0. 466600001 |
| 0. 215690002 | 0. 734009981 | 0. 466600001 |
| 0. 392159998 | 0. 734000027 | 0. 466600001 |
| 0. 392159998 | 0. 890860021 | 0. 466600001 |
| 0. 549019992 | 0. 734009981 | 0. 466600001 |
| 0. 725489974 | 0. 734000027 | 0. 466600001 |
| 0. 725489974 | 0. 890860021 | 0. 466600001 |
| 0. 882350028 | 0. 734009981 | 0. 466600001 |
| 0. 549019992 | 0. 400680006 | 0. 466600001 |
| 0. 000000000 | 0. 008510000 | 0. 466600001 |
| 0. 002320000 | 0. 174009994 | 0. 466600001 |
| 0. 165500000 | 0. 010840000 | 0. 466600001 |
| 0. 165500000 | 0. 174009994 | 0. 466600001 |
| 0. 333330005 | 0. 008510000 | 0. 466600001 |
| 0. 335669994 | 0. 174009994 | 0. 466600001 |
| 0. 498829991 | 0. 010840000 | 0. 466600001 |
| 0. 498829991 | 0. 174009994 | 0. 466600001 |
| 0. 666670024 | 0. 008510000 | 0. 466600001 |

|             |             |             |
|-------------|-------------|-------------|
| 0.669000030 | 0.174009994 | 0.466600001 |
| 0.832159996 | 0.010840000 | 0.466600001 |
| 0.832159996 | 0.174009994 | 0.466600001 |
| 0.000000000 | 0.341839999 | 0.466600001 |
| 0.002320000 | 0.507350028 | 0.466600001 |
| 0.165509999 | 0.344170004 | 0.466600001 |
| 0.165500000 | 0.507350028 | 0.466600001 |
| 0.333330005 | 0.341839999 | 0.466600001 |
| 0.335669994 | 0.507350028 | 0.466600001 |
| 0.498840004 | 0.344170004 | 0.466600001 |
| 0.498829991 | 0.507350028 | 0.466600001 |
| 0.666670024 | 0.341839999 | 0.466600001 |
| 0.669000030 | 0.507350028 | 0.466600001 |
| 0.832159996 | 0.344170004 | 0.466600001 |
| 0.832159996 | 0.507350028 | 0.466600001 |
| 0.000000000 | 0.675180018 | 0.466600001 |
| 0.002320000 | 0.840680003 | 0.466600001 |
| 0.165509999 | 0.677510023 | 0.466600001 |
| 0.165500000 | 0.840680003 | 0.466600001 |
| 0.333330005 | 0.675180018 | 0.466600001 |
| 0.335660011 | 0.840680003 | 0.466600001 |
| 0.498840004 | 0.677510023 | 0.466600001 |
| 0.498829991 | 0.840680003 | 0.466600001 |
| 0.666670024 | 0.675180018 | 0.466600001 |
| 0.668990016 | 0.840680003 | 0.466600001 |
| 0.832170010 | 0.677510023 | 0.466600001 |
| 0.832159996 | 0.840680003 | 0.466600001 |

POSCAR-Fe@g-BC3N4

1. 0

|                |                |                |
|----------------|----------------|----------------|
| 14. 3542003632 | 0. 0000000000  | 0. 0000000000  |
| 7. 1774726155  | 12. 4301933552 | 0. 0000000000  |
| 0. 0000000000  | 0. 0000000000  | 20. 0000000000 |

|    |   |    |    |
|----|---|----|----|
| C  | B | N  | Fe |
| 26 | 1 | 36 | 1  |

Direct

|              |              |              |
|--------------|--------------|--------------|
| 0. 060059998 | 0. 066509999 | 0. 466600001 |
| 0. 060040001 | 0. 223820001 | 0. 466600001 |
| 0. 216820002 | 0. 066780001 | 0. 466600001 |
| 0. 392269999 | 0. 067649998 | 0. 466600001 |
| 0. 389889985 | 0. 226390004 | 0. 466600001 |
| 0. 549430013 | 0. 069069996 | 0. 466600001 |
| 0. 726040006 | 0. 068329997 | 0. 466600001 |
| 0. 730589986 | 0. 223289996 | 0. 466600001 |
| 0. 884880006 | 0. 065109998 | 0. 466600001 |
| 0. 058430001 | 0. 400900006 | 0. 466600001 |
| 0. 057130001 | 0. 558499992 | 0. 466600001 |
| 0. 214399993 | 0. 401450008 | 0. 466600001 |
| 0. 389030010 | 0. 401980013 | 0. 466600001 |
| 0. 389030010 | 0. 559300005 | 0. 466600001 |
| 0. 730599999 | 0. 396429986 | 0. 466600001 |
| 0. 726010025 | 0. 555980027 | 0. 466600001 |
| 0. 884850025 | 0. 400389999 | 0. 466600001 |
| 0. 057140000 | 0. 734770000 | 0. 466600001 |
| 0. 058470000 | 0. 891059995 | 0. 466600001 |
| 0. 214420006 | 0. 734499991 | 0. 466600001 |
| 0. 389910012 | 0. 734080017 | 0. 466600001 |
| 0. 392289996 | 0. 890450001 | 0. 466600001 |
| 0. 549430013 | 0. 731850028 | 0. 466600001 |
| 0. 724200010 | 0. 734380007 | 0. 466600001 |
| 0. 724200010 | 0. 891799986 | 0. 466600001 |
| 0. 881179988 | 0. 734610021 | 0. 466600001 |
| 0. 555750012 | 0. 397269994 | 0. 466600001 |
| 0. 001330000 | 0. 007330000 | 0. 466600001 |
| 0. 004140000 | 0. 173120007 | 0. 466600001 |
| 0. 166710004 | 0. 010230000 | 0. 466600001 |
| 0. 166690007 | 0. 173449993 | 0. 466600001 |
| 0. 334380001 | 0. 008000000 | 0. 466600001 |
| 0. 335229993 | 0. 174250007 | 0. 466600001 |
| 0. 499049991 | 0. 012310000 | 0. 466600001 |
| 0. 497099996 | 0. 176840007 | 0. 466600001 |
| 0. 666010022 | 0. 010160000 | 0. 466600001 |

|             |             |             |
|-------------|-------------|-------------|
| 0.671190023 | 0.175070003 | 0.466600001 |
| 0.832650006 | 0.010410000 | 0.466600001 |
| 0.836939991 | 0.171049997 | 0.466600001 |
| 0.001300000 | 0.341740012 | 0.466600001 |
| 0.001260000 | 0.507700026 | 0.466600001 |
| 0.164810002 | 0.344559997 | 0.466600001 |
| 0.163619995 | 0.508360028 | 0.466600001 |
| 0.330399990 | 0.342999995 | 0.466600001 |
| 0.331730008 | 0.509289980 | 0.466600001 |
| 0.493880004 | 0.345620006 | 0.466600001 |
| 0.493889987 | 0.510779977 | 0.466600001 |
| 0.675119996 | 0.337590009 | 0.466600001 |
| 0.671180010 | 0.504059970 | 0.466600001 |
| 0.836939991 | 0.342350006 | 0.466600001 |
| 0.832620025 | 0.507300019 | 0.466600001 |
| 0.998310030 | 0.676050007 | 0.466600001 |
| 0.001300000 | 0.841440022 | 0.466600001 |
| 0.163640007 | 0.678380013 | 0.466600001 |
| 0.164849997 | 0.840990007 | 0.466600001 |
| 0.330419987 | 0.676940024 | 0.466600001 |
| 0.335249990 | 0.840879977 | 0.466600001 |
| 0.497119993 | 0.676400006 | 0.466600001 |
| 0.499060005 | 0.838989973 | 0.466600001 |
| 0.666000009 | 0.674179971 | 0.466600001 |
| 0.667859972 | 0.841260016 | 0.466600001 |
| 0.830780029 | 0.678200006 | 0.466600001 |
| 0.830770016 | 0.841409981 | 0.466600001 |
| 0.556869984 | 0.562240005 | 0.526000023 |
